# Supplementary material
Source: PubMed Central journal article supplement (PMC3678723)

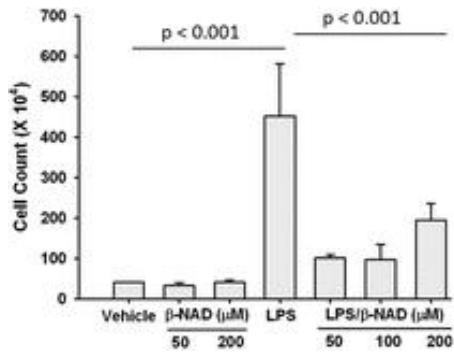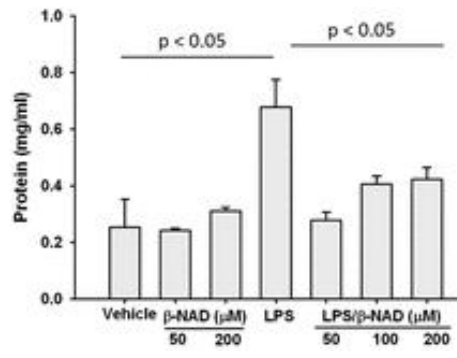

Supplement: NIHMS467979-supplement-Supplementary_Data_Figure_1.pdf [file NIHMS467979-supplement-Supplementary_Data_Figure_1.pdf]
